# Supplementary material
Source: PubMed Central journal article supplement (PMC2998709)
Supplement: NIHMS191821-supplement-supplement_1.pdf [file NIHMS191821-supplement-supplement_1.pdf]

**Supplementary Figure 1. *Ikkβ* was not deleted in aortic endothelial cells from *Ikkβ<sup>F/F</sup>/Tie2-Cre* mice that survived to adults.** **A.** Genomic DNA was prepared from *Ikkβ<sup>F/F</sup>/Tie2-Cre* and *Ikkβ<sup>F/F</sup>* aortic endothelial cells. Control DNA sample was prepared from *Ikkβ<sup>F/F</sup>/Tie2-Cre* embryo. Normal PCR was performed to analyze the genotype. No knockout band was detected in *Ikkβ<sup>F/F</sup>/Tie2-Cre* aortic endothelial cells. **B.** The level of IKKβ was measured by Western blot. These results are representative of three individual experiments.

**Supplementary Figure 2. Fluorescence-activated cell sorting (FACS)** High speed FACS analysis of endothelial cells with PECAM-1-PE antibody from E12.5 embryos. Green curve shows the total cell population. P1 population (approximately 5% of the total cells) is the PECAM-1 positive portion that was sorted and collected.

**Supplementary Figure 3. Unaltered proliferation in other organs at E13.5 in *Ikkβ<sup>F/F</sup>/Tie2-Cre* embryos.** BrdU incorporation in hearts, lungs and kidneys of *Ikkβ<sup>F/F</sup>/Tie2-Cre* embryos at E13.5 was normal compared to *Ikkβ<sup>F/F</sup>* embryos. 40X, scale bar 50 μm.

**Supplementary Figure 4. Apoptosis was less severe in *Ikkβ<sup>F/F</sup>/Tie2-Cre* livers at E12.5 than at E13.5.** Cleaved Caspase-3 (Asp175) antibody IHC staining of paraffin-embedded sections at E12.5. 40X, scale bar 50 μm.

**Supplementary Table 1. Lethality of *Ikkβ<sup>F/F</sup>/Tie2-Cre* mice**

| <b>Embryonic Day</b> | <b>Total embryos</b> | <b><i>Ikkβ<sup>F/F</sup>/Tie2-Cre</i> embryos</b> | <b>Expected <i>Ikkβ<sup>F/F</sup>/Tie2-Cre</i> embryos</b> |
|----------------------|----------------------|---------------------------------------------------|------------------------------------------------------------|
| <b>E12.5</b>         | 72                   | 20                                                | 18                                                         |
| <b>E13.5</b>         | 68                   | 11                                                | 17                                                         |
| <b>E15.5</b>         | 62                   | 2                                                 | 15.5                                                       |
| <b>E17.5</b>         | 79                   | 2                                                 | 19.75                                                      |
| <b>P0</b>            | 103                  | 2                                                 | 25.75                                                      |

Footnote: Expected Mendelian ratio is 25%.

Viable: heartbeat can be detected at dissection.
